# Supplementary material
Source: PubMed Central journal article supplement (PMC9123649)
Supplement: NIHMS1803246-supplement-Table_S1_Areg_and_Areg_LasB_Mass-spectrometry_dataset.pdf [file NIHMS1803246-supplement-Table_S1_Areg_and_Areg_LasB_Mass-spectrometry_dataset.pdf]

| Peptide    | Protein  | Peptide Modified Sequence         |
|------------|----------|-----------------------------------|
| KKNPCNAE   | NP_00164 | KKNPC[+57]NAEFQNFC[+57]           |
| KKNPCNAE   | NP_00164 | KKNPC[+57]NAEFQN                  |
| KNPCNAEF   | NP_00164 | KNPC[+57]NAEFQNFC[+57]IHGEC[+57]K |
| KNPCNAEF   | NP_00164 | KNPC[+57]NAEFQNF                  |
| KNPCNAEF   | NP_00164 | KNPC[+57]NAEFQN                   |
| KNPCNAEF   | NP_00164 | KNPC[+57]NAEFQ                    |
| KNPCNAEF   | NP_00164 | KNPC[+57]NAEF                     |
| NPCNAEFQ   | NP_00164 | NPC[+57]NAEFQNFC[+57]             |
| NPCNAEFQ   | NP_00164 | NPC[+57]NAEFQNF                   |
| NPCNAEFQ   | NP_00164 | NPC[+57]NAEFQN                    |
| NPCNAEFQ   | NP_00164 | NPC[+57]NAEFQ                     |
| PCNAEFQN   | NP_00164 | PC[+57]NAEFQNFC[+57]IHGEC[+57]K   |
| NAEFQNF    | NP_00164 | NAEFQNFC[+57]IHGEC[+57]K          |
| FQNF       | NP_00164 | FQNF[+57]IHGEC[+57]K              |
| FCIHGECK   | NP_00164 | FC[+57]IHGEC[+57]K                |
| YIEHLEAVTC | NP_00164 | YIEHLEAVTC[+57]K                  |
| IEHLEAVTCI | NP_00164 | IEHLEAVTC[+57]K                   |
| CQQEYFGEF  | NP_00164 | C[+57]QQEYFGER                    |
